# Supplementary material for: Hapten synthesis and antibody production for the development of a paper immunosensor for lean meat powder zilpaterol
Source: Royal Society of Chemistry journal article supplement (doi:10.1039/d1nj00426c), 2021-01-01
Supplement: d1nj00426c1.pdf [file d1nj00426c1.pdf]

## Supplementary Material

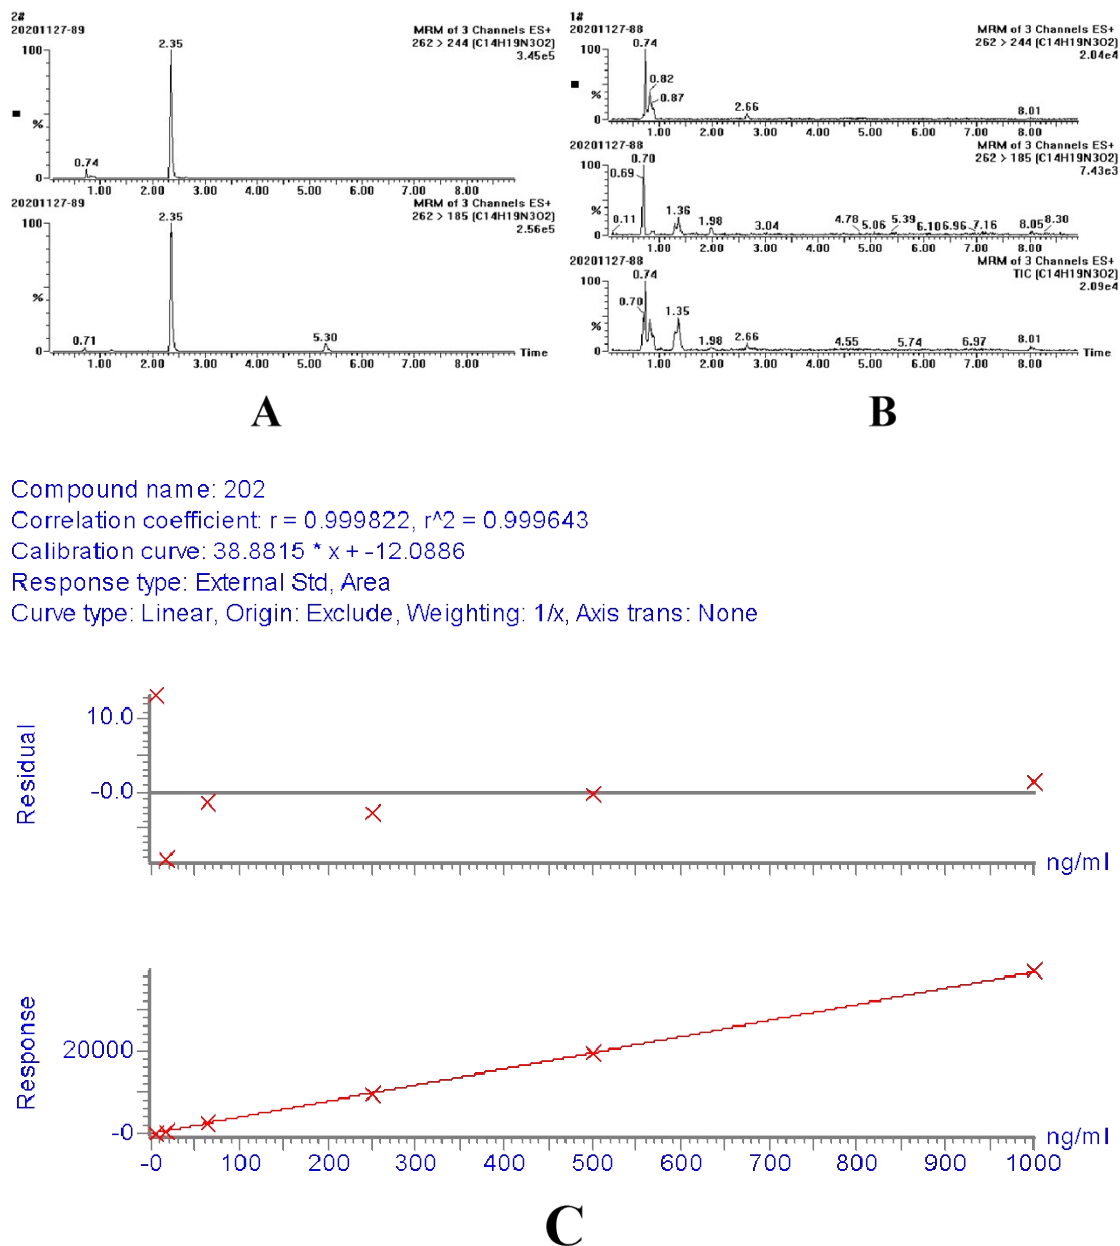

**Fig.S1.** (A) LC-MS spectrum of swine urine blank sample. (B) LC-MS detection spectrum of swine urine with 20 µg/kg zilpaterol. (C) Standard curve of swine urine matrix established by LC-MS detection.

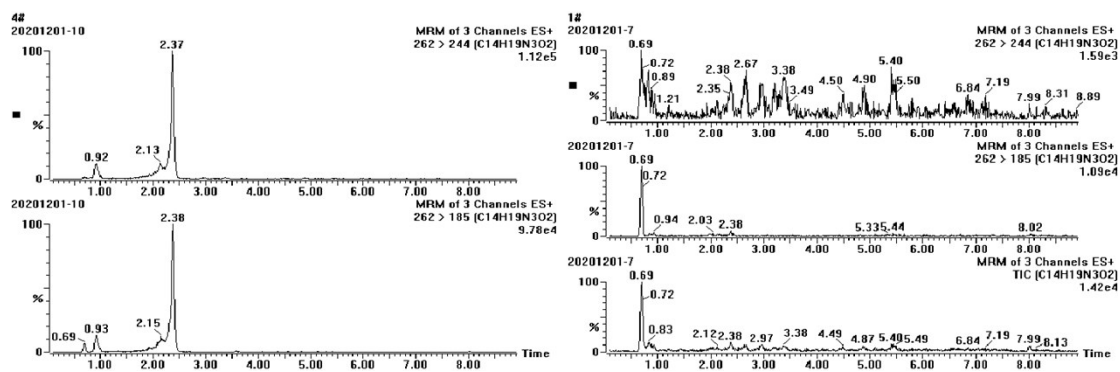

**A**

**B**

Compound name: 244  
 Correlation coefficient:  $r = 0.993990$ ,  $r^2 = 0.988015$   
 Calibration curve:  $166.84 * x + 942.309$   
 Response type: External Std, Area  
 Curve type: Linear, Origin: Exclude, Weighting: 1/x, Axis trans: None

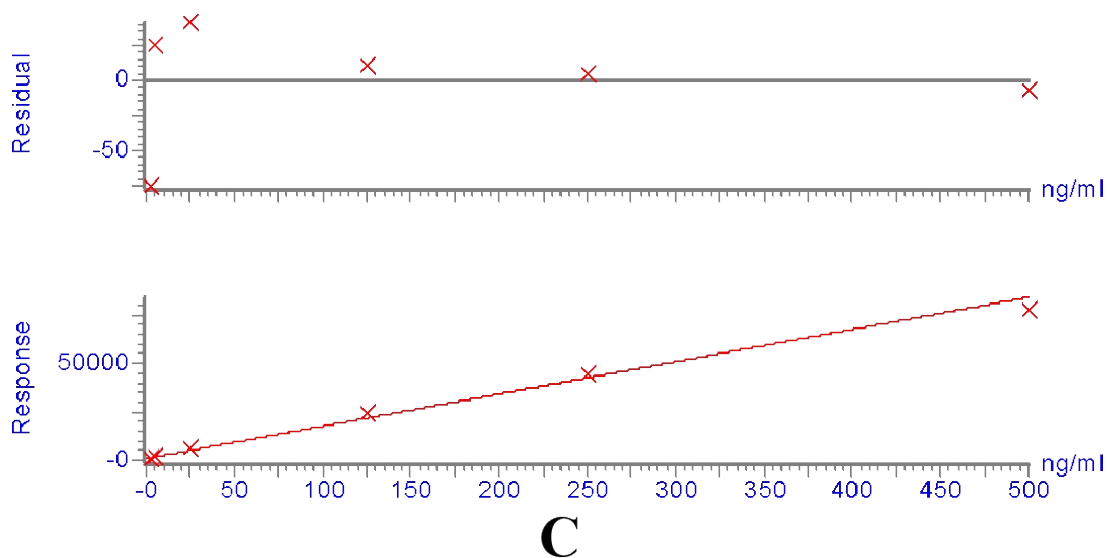

**C**

**Fig.S2.** (A) LC-MS spectrum of pork blank sample. (B) LC-MS detection spectrum of pork with 20µg/kg zilpaterol. (C) Standard curve of pork established by LC-MS detection.

**Table S1.** Instrument parameters for LC-MS/MS analyses

---

| <b>LC parameters</b>              |                                             |                                         |  |
|-----------------------------------|---------------------------------------------|-----------------------------------------|--|
| Column                            | BEH C18 column (100 mm ×2.1 mm i.d., 1.7µm) |                                         |  |
| Flow rate                         | 0.3 mL/min                                  |                                         |  |
| Column temperature                | 45°C                                        |                                         |  |
| Injection volume                  | 1µL                                         |                                         |  |
| Gradient timetable                |                                             |                                         |  |
| Time(min)                         | Acetonitrile (%)                            | 0.1% formic acid in ultrapure water (%) |  |
| 0                                 | 5%                                          | 95%                                     |  |
| 12                                | 21%                                         | 79%                                     |  |
| 15                                | 60%                                         | 40%                                     |  |
| 17                                | 80%                                         | 20%                                     |  |
| <b>Electrospray MS parameters</b> |                                             |                                         |  |
| Desolvation gas flow              | 700L/h                                      |                                         |  |
| Collision gas volume              | 0.15mL/min                                  |                                         |  |
| Desolvation gas temperature       | 400°C                                       |                                         |  |
| Ion source block temperature      | 100°C                                       |                                         |  |

---
